# Supplementary material for: Validation of a simple screening tool for early diagnosis of advanced Parkinson’s disease in daily practice: the CDEPA questionnaire
Source: PubMed Central journal article supplement (PMC6028449; doi:10.1038/s41531-018-0056-2), 2018-07-02
Supplement: 41531_2018_56_MOESM1_ESM.pdf [file 41531_2018_56_MOESM1_ESM.pdf]

## Supplementary Material

**Table 1S.** Descriptive data of the study questionnaires

|                                                          | No. patients (%) | Mean $\pm$ SD (95% confidence interval) |
|----------------------------------------------------------|------------------|-----------------------------------------|
| Hoehn and Yahr staging (n = 173)                         |                  |                                         |
| Stage 1                                                  | 16 (9.4)         |                                         |
| Stage 2                                                  | 57 (33.3)        |                                         |
| Stage 3                                                  | 51 (29.8)        |                                         |
| Stage 4                                                  | 38 (22.2)        |                                         |
| Stage 5                                                  | 9 (5.3)          |                                         |
| SCOPA Motor Scale (n = 173)                              |                  | 23.32 $\pm$ 14.16 (21.19 – 25.44)       |
| Examination (motor evaluation)                           |                  | 12.7 $\pm$ 7.2 (11.7-13.8)              |
| Activities of daily living                               |                  | 7.6 $\pm$ 5.3 (7.0-8.4)                 |
| Dyskinesias                                              |                  | 1.6 $\pm$ 1.9 (1.3-1.8)                 |
| Motor fluctuations                                       |                  | 2.0 $\pm$ 1.8 (1.7-2.2)                 |
| Non-Motor Symptoms Scale (n = 173)                       |                  |                                         |
| Cardiovascular                                           |                  | 1.0 $\pm$ 1.9 (0.7-1.3)                 |
| Sleep/fatigue                                            |                  | 9.2 $\pm$ 8.3 (7.9-10.4)                |
| Mood/apathy                                              |                  | 9.5 $\pm$ 14.4 (7.4-11.7)               |
| Perceptual problems/hallucinations                       |                  | 1.4 $\pm$ 3.6 (0.8-1.9)                 |
| Attention/memory                                         |                  | 4.7 $\pm$ 7.2 (3.6-5.8)                 |
| Gastrointestinal tract                                   |                  | 4.5 $\pm$ 5.6 (3.8-5.4)                 |
| Urinary function                                         |                  | 7.9 $\pm$ 8.3 (6.7-9.2)                 |
| Sexual function                                          |                  | 3.9 $\pm$ 6.0 (3.0-4.8)                 |
| Miscellaneous                                            |                  | 6.9 $\pm$ 6.9 (6.0-8.0)                 |
| Total score                                              |                  | 49.0 $\pm$ 40.2 (43.0-55.1)             |
| Clinical Impression of Severity Index for PD (n = 169)   |                  | 10.1 $\pm$ 5.3 (9.3-11.*9)              |
| Clinical Global Impression of Severity (n = 196)         |                  |                                         |
| Normal, not at all ill                                   | 0                |                                         |
| Borderline                                               | 6 (3.5)          |                                         |
| Mildly ill                                               | 38 (22.9)        |                                         |
| Moderately ill                                           | 66 (38.4)        |                                         |
| Markedly ill                                             | 36 (20.9)        |                                         |
| Severely ill                                             | 25 (14.5)        |                                         |
| Among the most extremely ill patients                    | 1 (0.6)          |                                         |
| Patient Global Impression of Severity (n = 172)          |                  |                                         |
| Normal                                                   | 5 (2.9)          |                                         |
| Very mild                                                | 8 (4.7)          |                                         |
| Mildly                                                   | 39 (22.7)        |                                         |
| Moderately                                               | 75 (43.6)        |                                         |
| Severe                                                   | 38 (22.1)        |                                         |
| Very severe                                              | 7 (4.1)          |                                         |
| Clinical judgement of PD stage (gold standard) (n = 173) |                  |                                         |
| Non-advanced                                             | 108 (62.4)       |                                         |
| Advanced                                                 | 65 (37.6)        |                                         |
| CDEPA questionnaire (n = 173)                            |                  |                                         |
| Non-advanced                                             | 64 (37.0)        |                                         |
| Advanced                                                 | 109 (63.0)       |                                         |
